# Supplementary material
Source: PubMed Central journal article supplement (PMC6485654)
Supplement: NIHMS75253-supplement-Supplements.pdf [file NIHMS75253-supplement-Supplements.pdf]

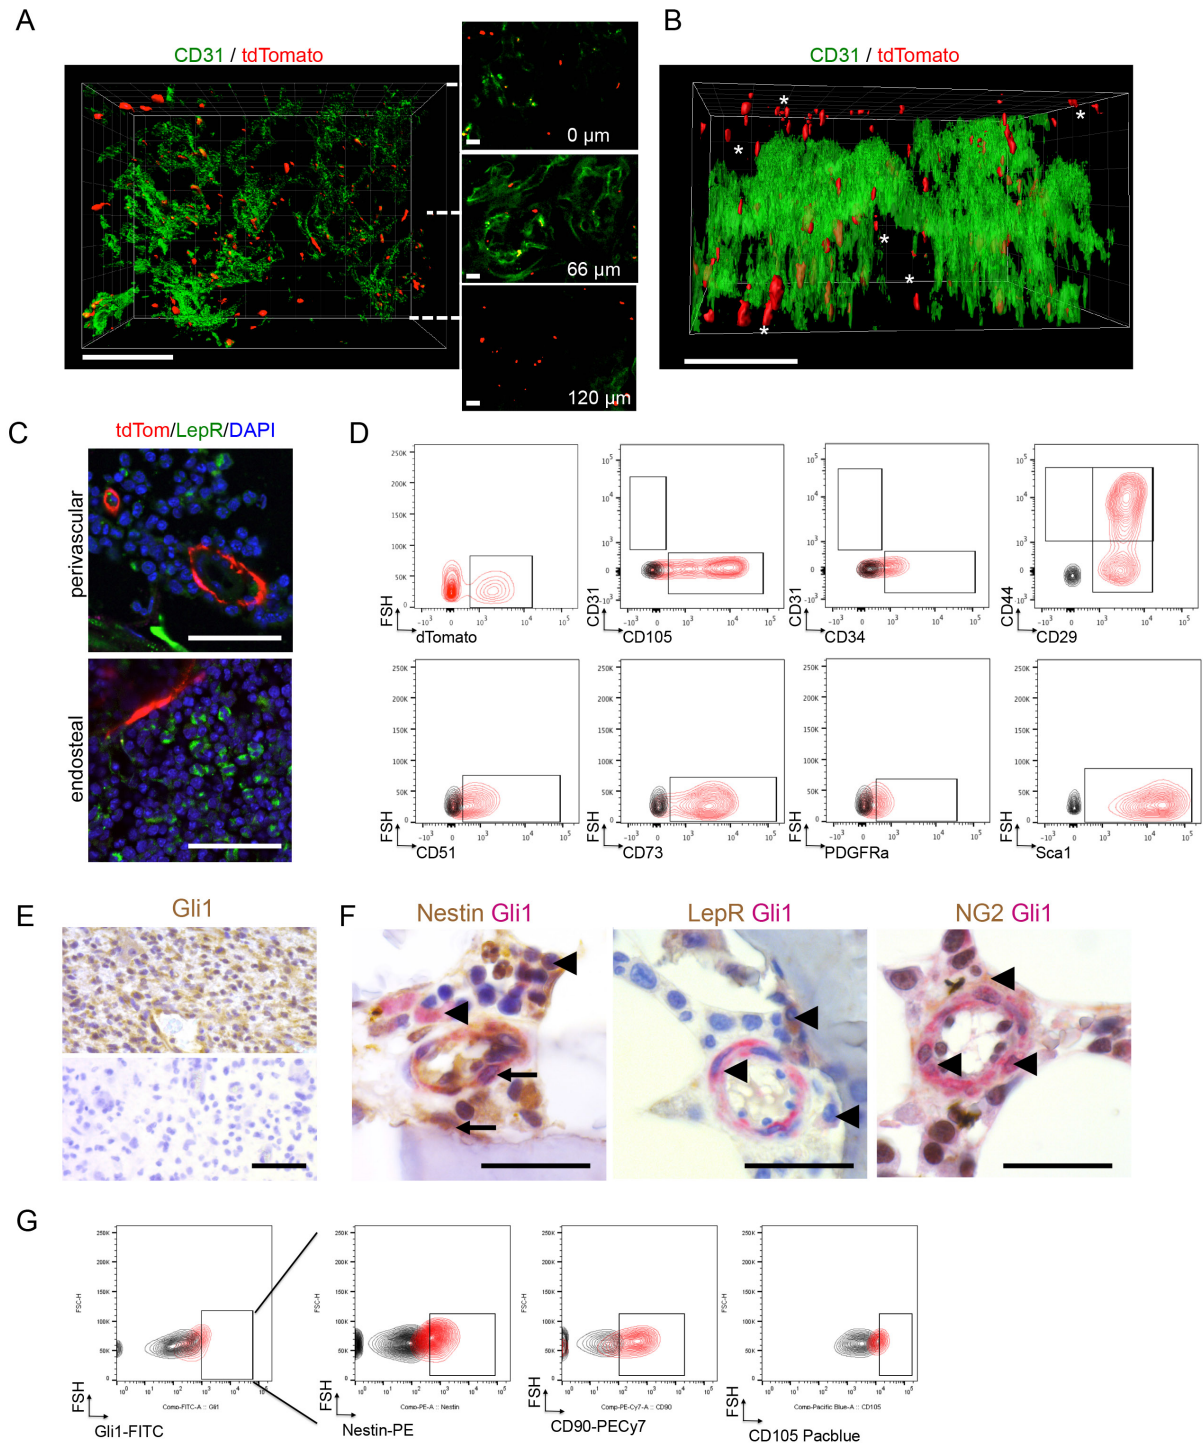

**Figure S1: Gli1<sup>+</sup> cells in mouse and human (related to Figure 1)**

**(A-B)** Confocal Z-stack (120 $\mu$ m) of mouse sternal bone after clearing and CD31 staining. Mid panel shows representative 2D images from the top, middle and bottom of the Z-stack. Asterisks mark the endosteal niche. Of note, many Gli1<sup>+</sup> cells that are in the endosteal niche are not associated with the vasculature. Scale bars 50  $\mu$ m. **(C)** Representative images of leptin-receptor (LepR) staining. Scale bars 30  $\mu$ m. **(D)** Representative flow cytometric plots of markers expressed in tdTomato<sup>+</sup> cells from whole bone marrow of bigenic Gli1CreER<sup>fl2</sup>;tdTomato mice at 10 days after tamoxifen pulse (3x10mg p.o.). tdTomato<sup>+</sup> cells were gated as shown in the first panel, and then co-expression of other markers was analyzed. The black population indicates the unstained, isotype control. **(E)** Validation of the Gli1 antibody for immunohistochemistry in EDTA-decalcified human glioblastoma multiforme tissue (upper panel). Negative control (only secondary antibody) to exclude endogenous peroxidase activity on the lower panel. Scale bar 50  $\mu$ m. **(F)** Representative images of

human bone marrow from healthy subjects co-stained for Gli1 (red) and Nestin, leptin receptor (LepR) and NG2 (brown). Arrows indicating double positive cells and arrow heads indicating cells that express only one of the antigens. Scale bars 50 $\mu$ m. **(G)** Representative flow cytometric plots and gating of human Gli1 expressing MSC (black indicating negative control). Quantification is illustrated in Figure 1M.

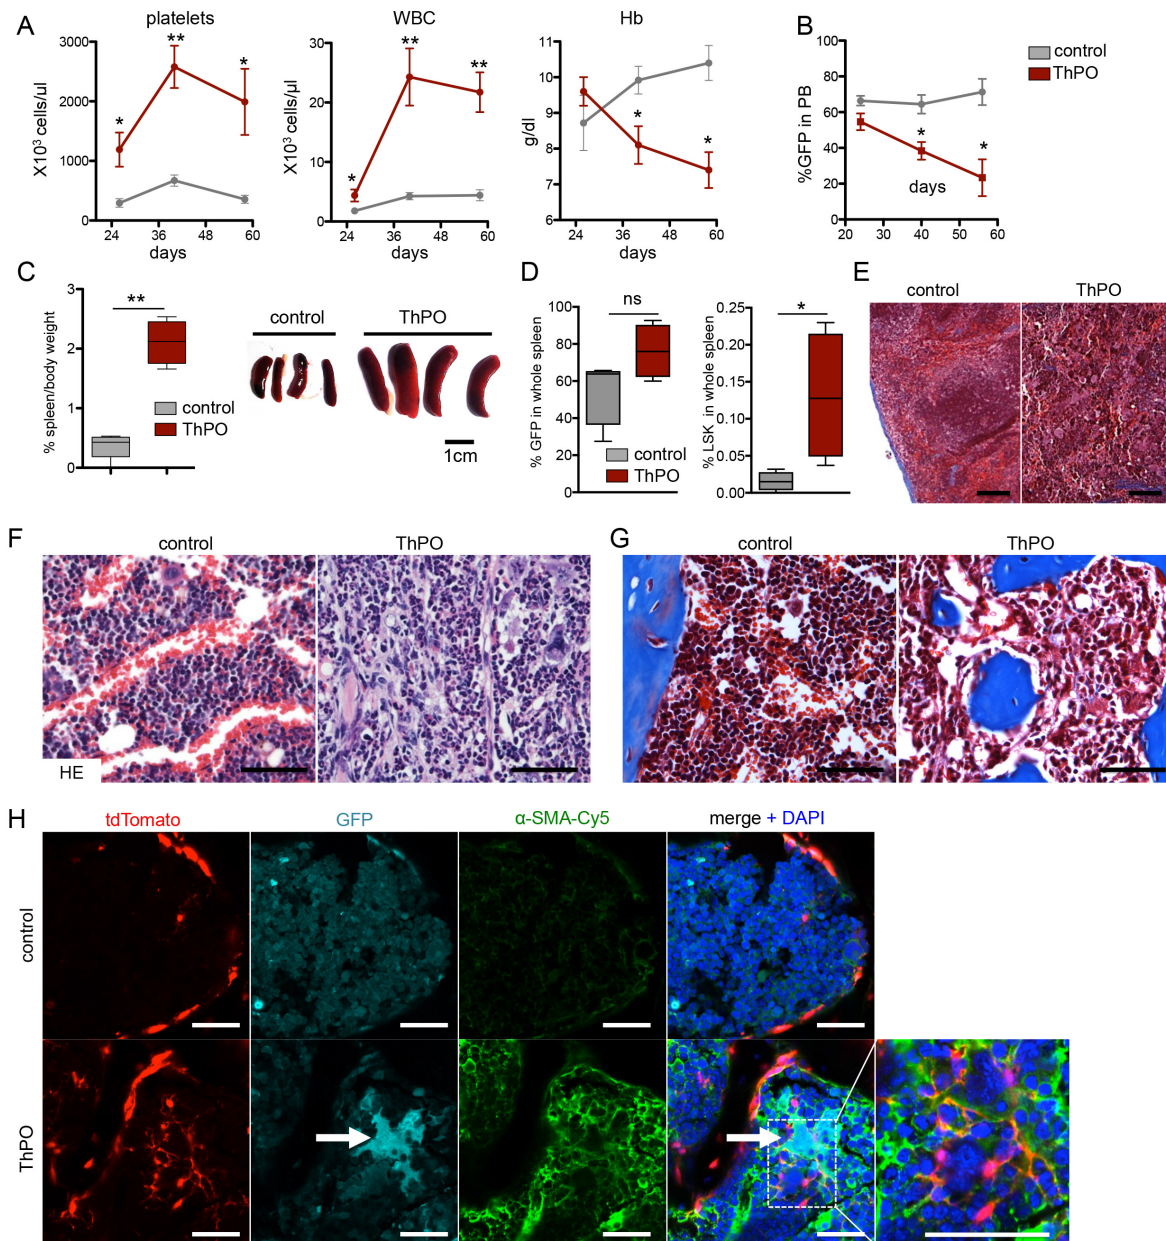

**Figure S2: Fate tracing of Gli1<sup>+</sup> cells in thrombopoietin induced myelofibrosis** (related to Figure 2)

**(A)** Time course of platelets, white blood cells (WBC) and hemoglobin (Hb) following bone marrow transplantation of thrombopoietin (ThPO) expressing or control cells in bigenic Gli1CreER;tdTomato mice (see Figure 2). \*p<0.05, \*\*p<0.01 by t-test, mean±SEM. **(B)** Time course of green fluorescent protein (GFP) expressing cells (gene marking) in peripheral blood (PB) \*p<0.05 by t-test, mean±SEM. **(C)** Spleen weight standardized to body weight and representative spleen images in the control and thrombopoietin (ThPO) group. \*p<0.01 by t-test, box plot and whiskers, min to max. **(D)** Percentage of GFP<sup>+</sup> and lineage<sup>low</sup>Sca1<sup>+</sup>,c-kit<sup>+</sup> (LSK) hematopoietic stem cells in the spleen of mice transplanted with control or thrombopoietin (ThPO) expressing cells. \*\*p<0.01 by t-test, box plot and whiskers, min to max. **(E-G)** Representative images of trichrome stained spleens and trichrome and hematoxylin-eosin (HE) stained bone marrows of control and thrombopoietin group (ThPO). Scale bars 100µm. **(H)** Representative images of sternal bones from control and thrombopoietin (ThPO) overexpressing bone marrows stained for alpha smooth muscle actin (αSMA-Cy5). Arrow shows GFP expressing ThPO+ megakaryocytes. Scale bars 50µm.



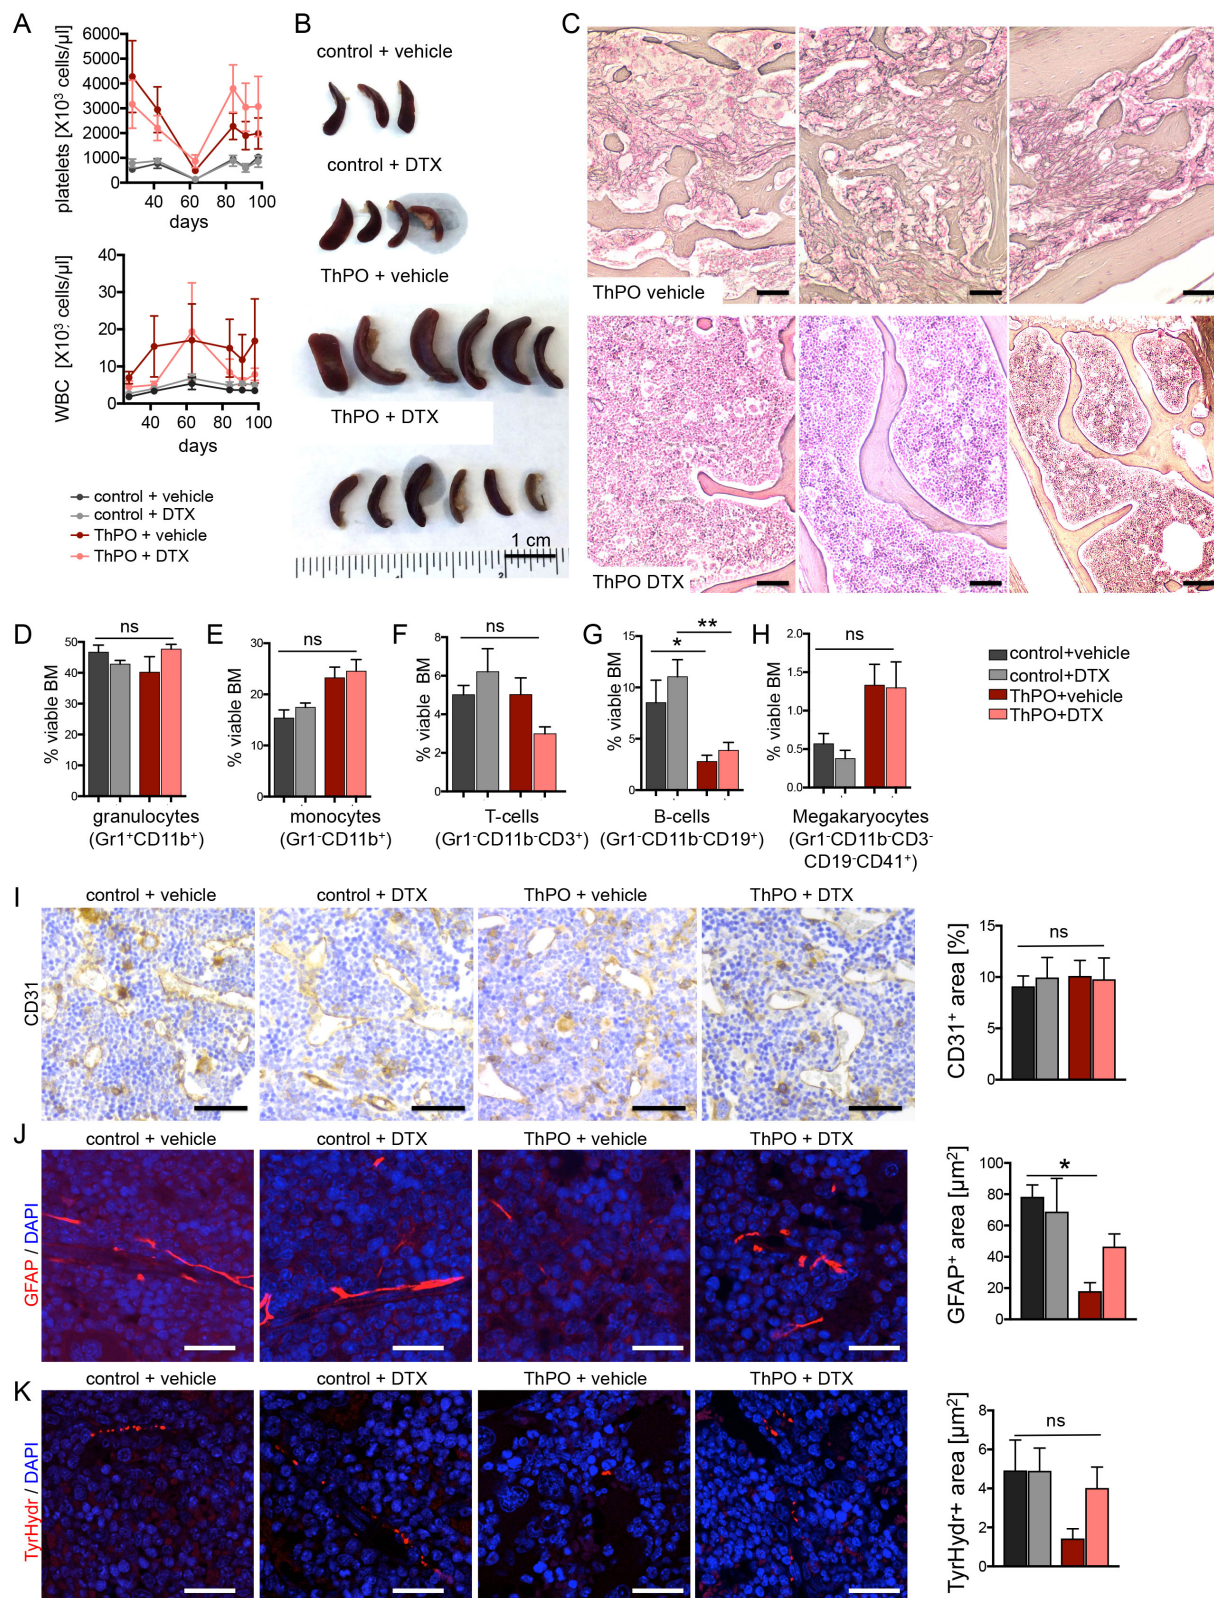

**Figure S3: Ablation of Gli1<sup>+</sup> cells does not affect myeloid lineages** (related to Figure 3)

**(A)** Time course of platelets and white blood cells (WBC) in mice transplanted with bone marrow cells expressing thrombopoietin (ThPO) or control plasmids, with and without ablation of Gli1<sup>+</sup> cells in bigenic Gli1CreER;iDTR mice. (DTX, diphtheriatoxin; ThPO, thrombopoietin; vehicle, PBS). **(B)** Representative images of spleens following ablation of Gli1<sup>+</sup> cells in bigenic Gli1CreER;iDTR mice. (DTX, diphtheriatoxin; ThPO, thrombopoietin; vehicle, PBS). **(C)** Representative images of reticulin stained sections from ThPO overexpressing mice that received vehicle or diphtheriatoxin (DTX) injection indicating severe osteosclerosis in the vehicle group whereas after DTX injection almost no osteosclerosis was

detectable. Scale bars 100 $\mu$ m. **(D-H)** Quantification of granulocytes, monocytes, CD3<sup>+</sup> T-cells, CD19<sup>+</sup> B-cells and megakaryocytes as a percentage of viable bone marrow cells following ablation of Gli1<sup>+</sup> cells in control and thrombopoietin overexpression group by diphtheriatxin (DTX) versus vehicle (PBS). mean $\pm$ SEM. **(I)** Representative images and surface area quantification of CD31 stained bone marrows with and without ablation of Gli1<sup>+</sup> cells in bigenic Gli1CreER;iDTR mice. Scale bars 25 $\mu$ m. Mean $\pm$ SEM. **(J-K)** Representative images and surface area quantification of glial fibrillary acidic protein (GFAP) and tyrosine hydroxylase stained bone marrows with and without ablation of Gli1<sup>+</sup> cells in bigenic Gli1CreER;iDTR mice. Scale bars 25 $\mu$ m. Mean $\pm$ SEM.\*p<0.05 by one way ANOVA with posthoc Tukey, mean $\pm$ SEM.



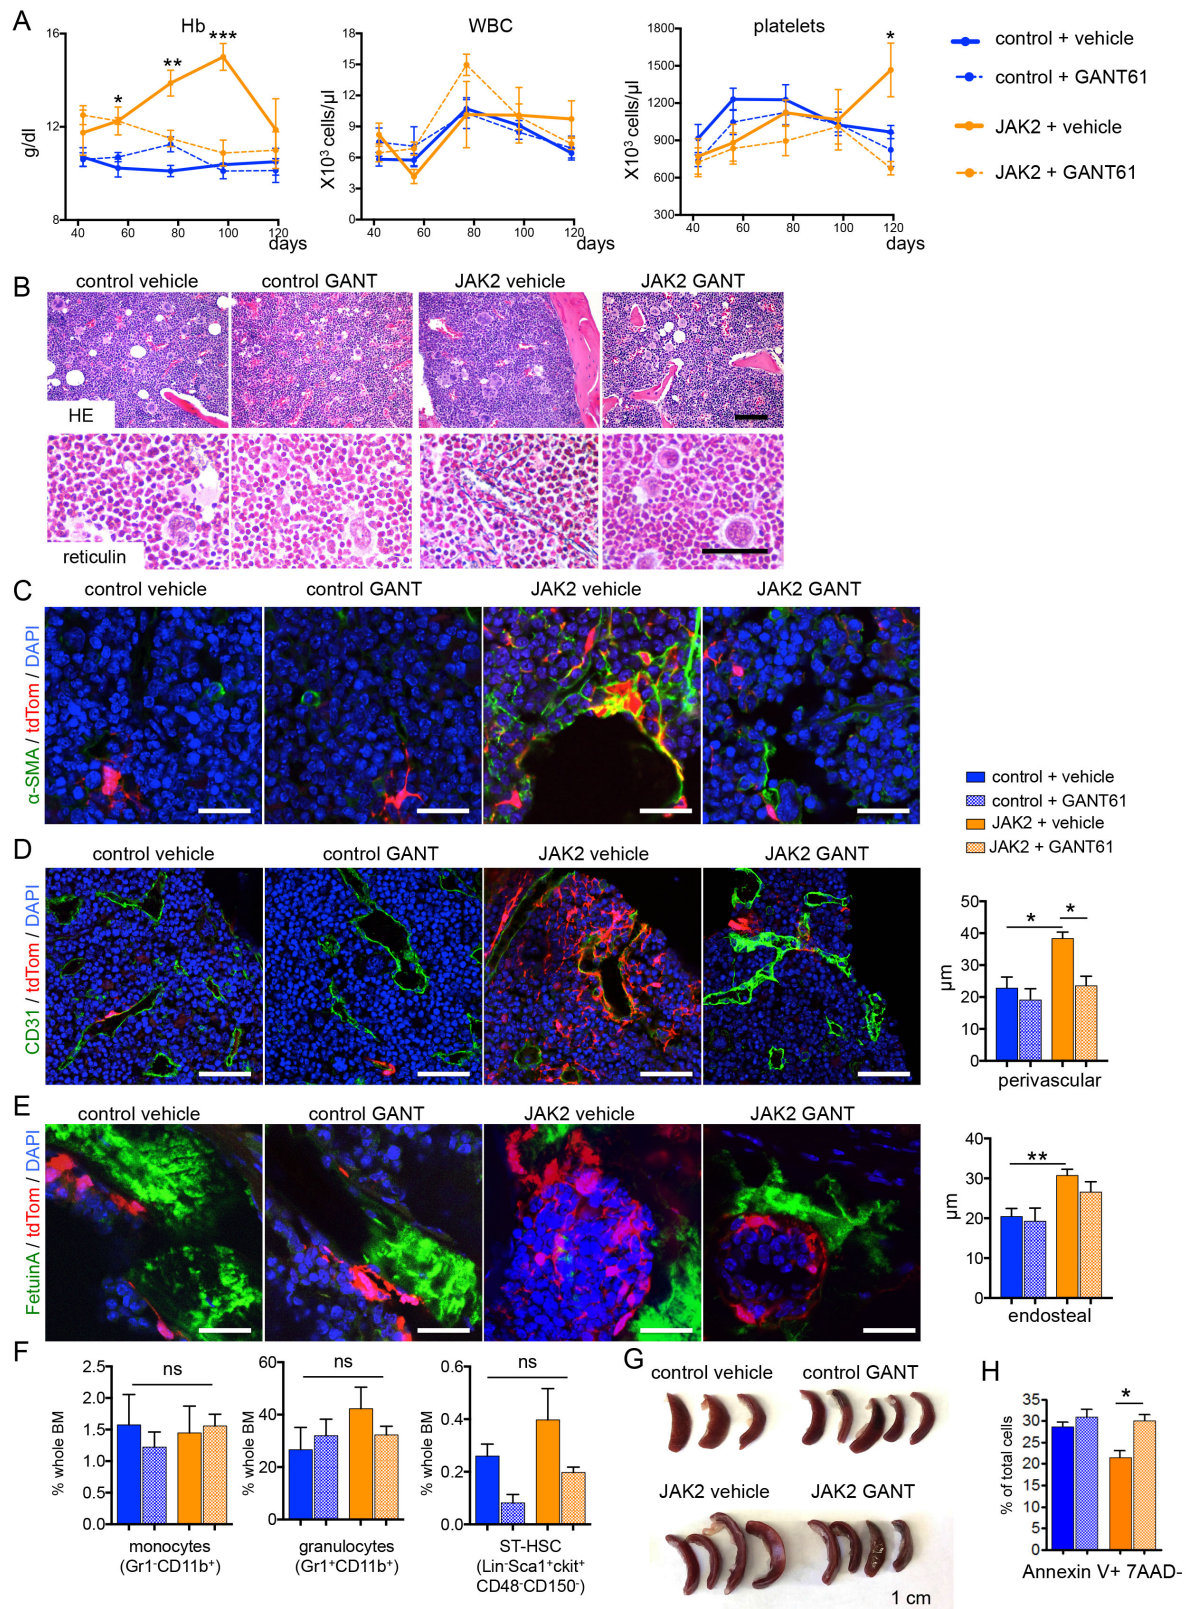

**Figure S4: GANT61 treatment ameliorates myelofibrosis by inhibiting both Gli1<sup>+</sup> cell expansion and the malignant hematopoietic clone (related to Figure 4)**

**(A)** Time course of hemoglobin (Hb), white blood cells (WBC) and platelets following bone marrow transplantation of hematopoietic stem cells retrovirally transduced with Jak2(V617F) (JAK2) or control cDNA (both MCSV-IRES-GFP retroviral backbone vector) in bigenic Gli1CreER;tdTomato mice treated with GANT61 or vehicle (corn oil/ethanol). \*p<0.05; \*\*p<0.01, \*\*\*p<0.001 by one way ANOVA with posthoc Tukey, mean $\pm$ SEM. **(B)** Representative images of hematoxylin and eosin (HE) or reticulin stained bone marrows from

Gli1CreER;tdTomato mice transplanted with JAK2(V617F) (JAK2) or control cDNA expressing bone marrow and treated with GANT61 (GANT) or vehicle. Scale bars 100 $\mu$ m. **(C)** Representative images of alpha smooth muscle actin ( $\alpha$ -SMA) staining in bone marrows from bigenic Gli1CreER;tdTomato mice transplanted with Jak2(V617F) (JAK2) or control cDNA expressing bone marrow and treated with GANT61 (GANT) or vehicle. Scale bars 50 $\mu$ m. For quantification see Figure 4E. **(D-E)** Representative images of CD31 and Fetuin A stained bone marrows from from bigenic Gli1CreER;tdTomato mice transplanted with Jak2(V617F) (JAK2) or control cDNA expressing bone marrow and treated with GANT61 (GANT) or vehicle. Distance to either CD31<sup>+</sup> endothelial cells or Fetuin A<sup>+</sup> bone was measured by Image J. Scale bars 50 $\mu$ m in D and 100 $\mu$ m in E, \*p<0.05; \*\*p<0.01 by one way ANOVA with posthoc Tukey, mean $\pm$ SEM. **(F)** Frequency of monocytes, granulocytes and short term hematopoietic stem cells (ST-HSC) as percentage of whole viable bone marrow (BM) from Gli1CreER;tdTomato mice transplanted with Jak2(V617F) (JAK2) or control cDNA expressing bone marrow and treated with GANT61 (GANT) or vehicle; mean $\pm$ SEM. **(G)** Representative images of spleens from Gli1CreER;tdTomato mice transplanted with JAK2 WT (control) or JAK2(V617F) (JAK2) expressing bone marrow and treated with GANT61 (GANT) or vehicle. **(H)** Quantification of early apoptosis (AnnexinV<sup>+</sup>7AAD<sup>+</sup>) in sort-purified c-kit<sup>+</sup> HSPCs [expressing control or Jak2(V617F) cDNA] treated with GANT61 or vehicle. \*p<0.05, by one way ANOVA with posthoc Tukey; mean $\pm$ SEM. n=3.

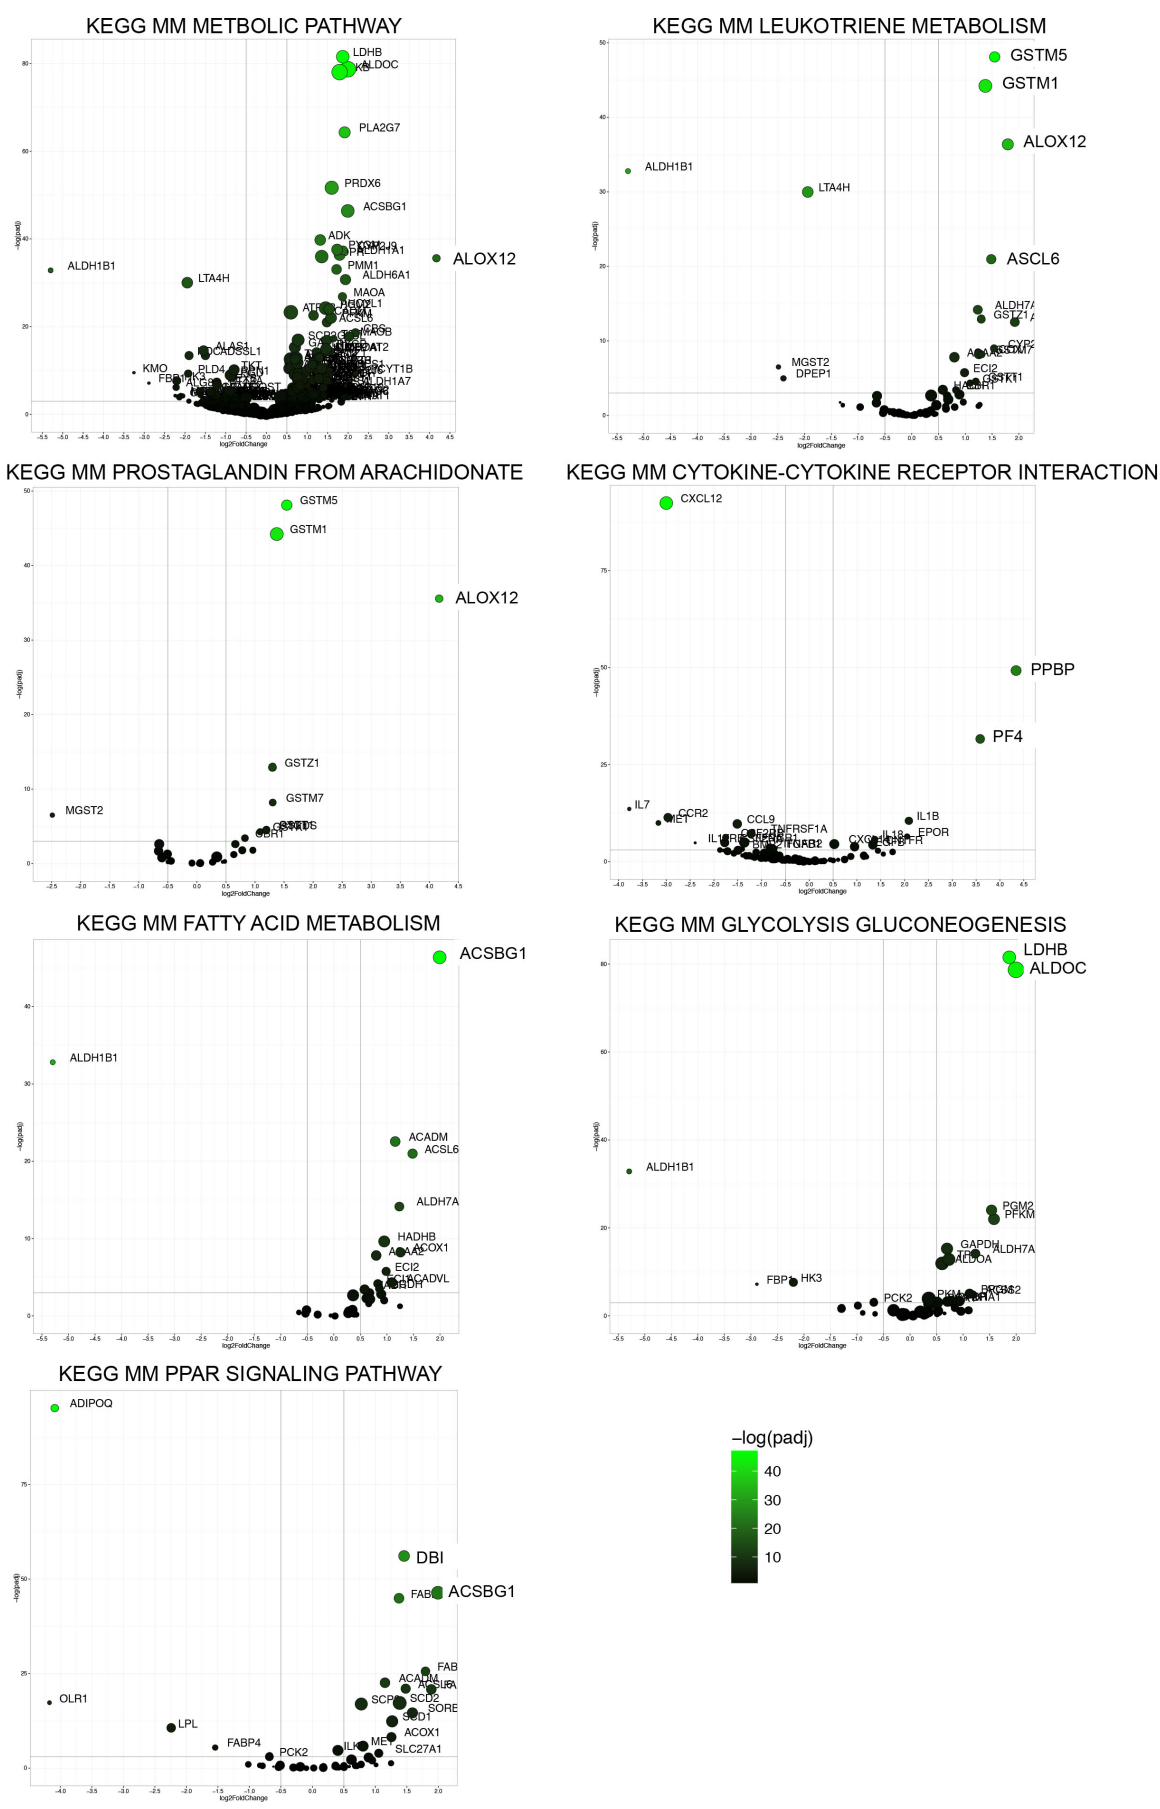

**Figure S5: Thrombopoietin overexpression in hematopoietic stem cells leads to distinct transcriptional changes in *Gli1*<sup>+</sup> cells (related to Figure 5)**  
 Volcano plots highlighting the distinct pathways from Figure 5.



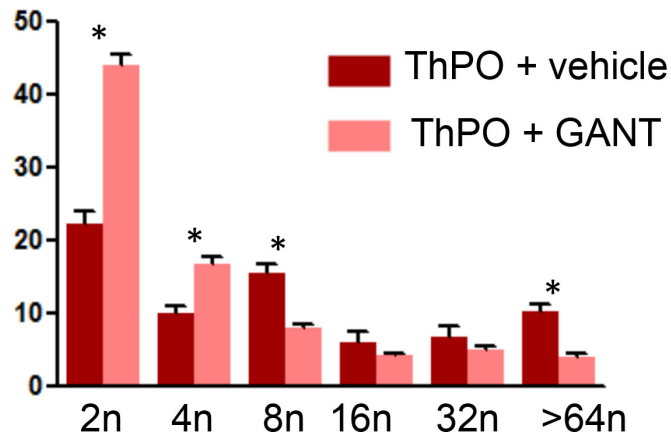

**Figure S6: GANT61 reduces the proliferation of ThPO overexpressing megakaryocytes** (related to Figure 6)

Quantification of megakaryocyte ploidy after permeabilization, staining for CD41 and DAPI of c-kit<sup>+</sup> HSC from wildtype mice that have been transduced with thrombopoietin (ThPO) and treated with GANT61 (10 $\mu$ M) or vehicle (DMSO) for 48h. \*p<0.05 by t-test, mean $\pm$ SEM.

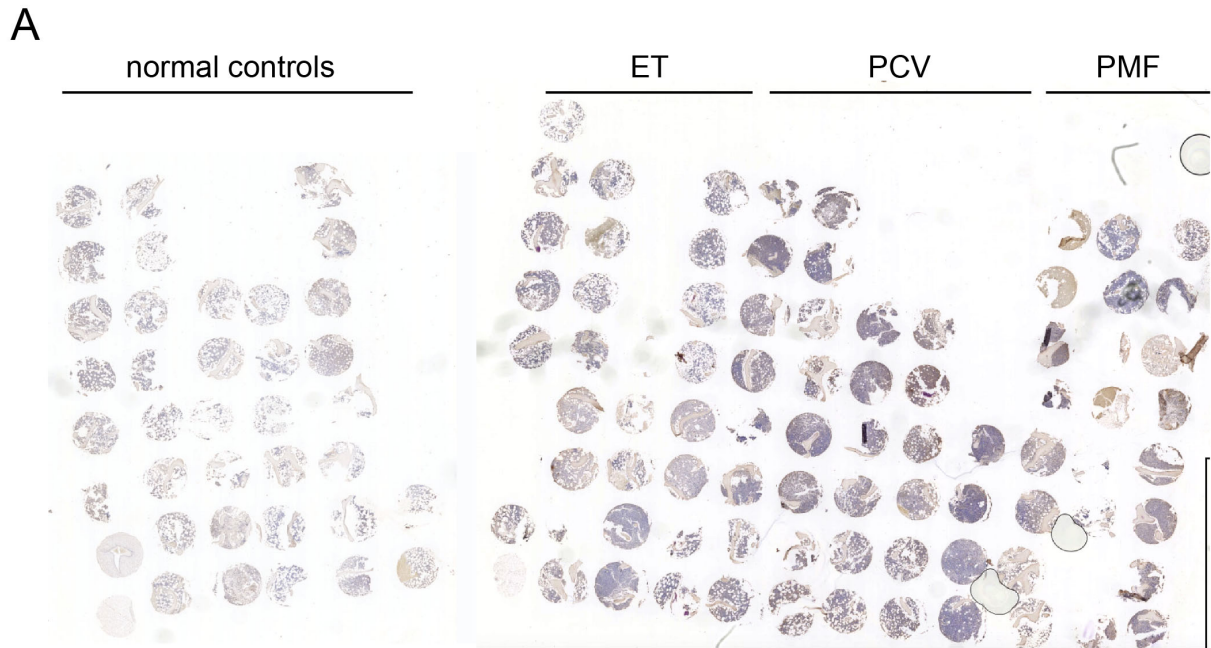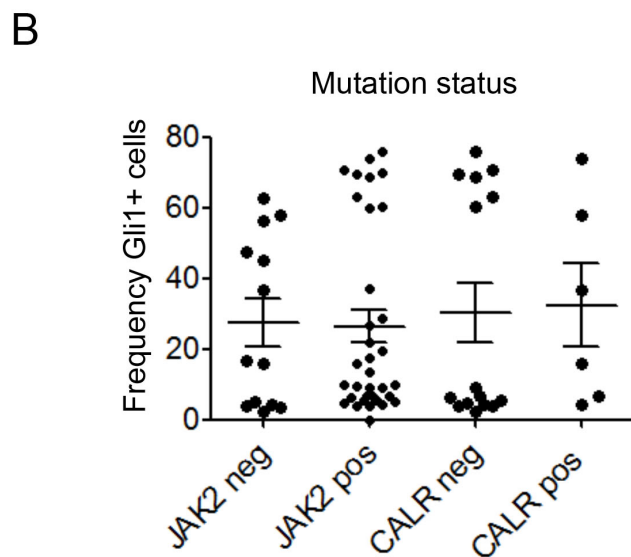

**Figure S7: Gli1 expression in human bone marrow biopsies** (related to Figure 7)

**(A)** Overview of tissue microarrays from healthy controls (no primary bone marrow disease) and patients with essential thrombocythemia (ET), polycythemia vera (PCV) and primary myelofibrosis (PMF) stained for Gli1. **(B)** Gli1<sup>+</sup> cells frequency in the bone marrow of patients with regards to their mutation status. mean±SEM. See Table S1 for patient characteristics.

**Table S1 Patient characteristics of bone marrow punch biopsies included (related to Figure 7)**

| #   | Diagnosis Pathology                                  | Age [y] | Sex | Hb [g/dl] | Plt [g/l] | MF | WBC [g/l] | clinical background                                                               | JAK2(V617F) | MPL | CALR | Gli1 mean frequency [%] |
|-----|------------------------------------------------------|---------|-----|-----------|-----------|----|-----------|-----------------------------------------------------------------------------------|-------------|-----|------|-------------------------|
| H1  | Normocellular bone marrow; trilinear differentiation | 52      | m   | 15.3      | 227       | 0  | 7         | slight weight loss                                                                | n/a         | n/a | n/a  | 1.1                     |
| H2  | Normocellular bone marrow; trilinear differentiation | 53      | f   | 12.1      | 249       | 0  | 4.8       | transient slight leukopenia                                                       | n/a         | n/a | n/a  | 1.5                     |
| H3  | Normocellular bone marrow; trilinear differentiation | 58      | m   | 15.1      | 184       | 0  | 4         | neurologic symptoms                                                               | n/a         | n/a | n/a  | 1.2                     |
| H4  | Normocellular bone marrow; trilinear differentiation | 59      | f   | 15.3      | 210       | 0  | 6.7       | slight transient Hb value increase                                                | n/a         | n/a | n/a  | 0.8                     |
| H5  | Normocellular bone marrow; trilinear differentiation | 60      | f   | 16.2      | 190       | 0  | 8.6       | slight transient Hb value increase                                                | n/a         | n/a | n/a  | 0.97                    |
| H6  | Normocellular bone marrow; trilinear differentiation | 61      | m   | 15.2      | 200       | 0  | 6.1       | slight transient thrombopenia                                                     | n/a         | n/a | n/a  | 1.27                    |
| H7  | Normocellular bone marrow; trilinear differentiation | 63      | f   | 13.1      | 180       | 0  | 7.6       | exclusion of MDS, but normal peripheral blood cell counts, no dysplastic features | n/a         | n/a | n/a  | 1.37                    |
| H8  | Normocellular bone marrow; trilinear differentiation | 66      | m   | 13.9      | 212       | 0  | 6.4       | transient IgE increase                                                            | n/a         | n/a | n/a  | 2.07                    |
| H9  | Normocellular bone marrow; trilinear differentiation | 68      | f   | 13.5      | 247       | 0  | 4.7       | transient slight leukopenia                                                       | n/a         | n/a | n/a  | 2.03                    |
| H10 | Normocellular bone marrow; trilinear differentiation | 69      | f   | 15.2      | 244       | 0  | 8.9       | two brothers with leukemia                                                        | n/a         | n/a | n/a  | 1.63                    |
| H11 | Normocellular bone marrow; trilinear differentiation | 71      | f   | 16.6      | 166       | 0  | 8.4       | slight transient Hb value increase                                                | n/a         | n/a | n/a  | 1.27                    |
| H12 | Normocellular bone marrow; trilinear differentiation | 72      | f   | 13.3      | 140       | 0  | 4         | slight weight loss                                                                | n/a         | n/a | n/a  | 1.13                    |
| H13 | Normocellular bone marrow; trilinear differentiation | 73      | m   | 13.6      | 205       | 0  | 7.9       | slight transient anemia                                                           | n/a         | n/a | n/a  | 1.2                     |
| H14 | Normocellular bone marrow; trilinear differentiation | 74      | m   | 15.7      | 147       | 0  | 4.96      | suspicion of Raunaud's disease                                                    | n/a         | n/a | n/a  | 1.4                     |
| H15 | Normocellular bone marrow; trilinear differentiation | 77      | m   | 14.1      | 164       | 0  | 6.2       | slight transient anemia                                                           | n/a         | n/a | n/a  | 0.87                    |
| H16 | Normocellular bone marrow; trilinear differentiation | 81      | m   | 12.5      | 247       | 0  | 6.3       | potential myelotoxic medication, but normal peripheral blood cell counts          | n/a         | n/a | n/a  | 2.04                    |
| H17 | Normocellular bone marrow; trilinear differentiation | 23      | f   | 10.7      | 357       | 0  | 6.4       | Mb. Hodgkin without involvement of extralymphatic organs                          | n/a         | n/a | n/a  | 0.75                    |
| H18 | Normocellular bone marrow; trilinear differentiation | 31      | f   | 13.5      | 170       | 0  | 8.8       | Mb. Hodgkin without involvement of extralymphatic organs                          | n/a         | n/a | n/a  | 1.5                     |
| H19 | Normocellular bone marrow; trilinear differentiation | 31      | m   | 14.7      | 378       | 0  | 9.1       | Mb. Hodgkin without involvement of extralymphatic organs                          | n/a         | n/a | n/a  | 0.4                     |
| H20 | Normocellular bone marrow; trilinear differentiation | 24      | f   | 11.6      | 374       | 0  | 9.2       | Mb. Hodgkin without involvement of extralymphatic organs                          | n/a         | n/a | n/a  | 2                       |
| H21 | Normocellular bone marrow; trilinear differentiation | 18      | m   | 15.8      | 229       | 0  | 7         | Mb. Hodgkin without involvement of extralymphatic organs                          | n/a         | n/a | n/a  | 0.85                    |
| H22 | Normocellular bone marrow; trilinear differentiation | 20      | f   | 7.1       | 446       | 0  | 16.7      | Mb. Hodgkin without involvement of extralymphatic organs                          | n/a         | n/a | n/a  | 3.5                     |
| H23 | Normocellular bone marrow; trilinear differentiation | 80      | m   | 13.2      | 216       | 0  | 5.6       | Mb. Hodgkin without involvement of extralymphatic organs                          | n/a         | n/a | n/a  | 0.8                     |
| H24 | Normocellular bone marrow; trilinear differentiation | n/a     | m   | n/a       | n/a       | 0  | n/a       | Mb. Hodgkin without involvement of extralymphatic organs                          | n/a         | n/a | n/a  | 0.75                    |
| H25 | Normocellular bone marrow; trilinear differentiation | 27      | m   | 14.8      | 374       | 0  | 7.7       | Mb. Hodgkin without involvement of extralymphatic organs                          | n/a         | n/a | n/a  | 0.3                     |
| H26 | Normocellular bone marrow; trilinear differentiation | 65      | m   | 12.9      | 264       | 0  | 9.4       | Mb. Hodgkin without involvement of extralymphatic organs                          | n/a         | n/a | n/a  | 0.25                    |
| H27 | Normocellular bone marrow; trilinear differentiation | n/a     | f   | n/a       | n/a       | 0  | n/a       | Mb. Hodgkin without involvement of extralymphatic organs                          | n/a         | n/a | n/a  | 0.45                    |
| H28 | Normocellular bone marrow; trilinear differentiation | 38      | m   | 13.4      | 224       | 0  | 9.4       | Mb. Hodgkin without involvement of extralymphatic organs                          | n/a         | n/a | n/a  | 2.5                     |
| H29 | Normocellular bone marrow; trilinear differentiation | 48      | f   | 13        | 517       | 0  | 6.3       | Mb. Hodgkin without involvement of extralymphatic organs                          | n/a         | n/a | n/a  | 0.5                     |
| H30 | Normocellular bone marrow; trilinear differentiation | 25      | m   | 11.3      | 624       | 0  | 1.5       | Mb. Hodgkin without involvement of extralymphatic organs                          | n/a         | n/a | n/a  | 0.55                    |
| H31 | Normocellular bone marrow; trilinear differentiation | n/a     | m   | n/a       | n/a       | 0  | n/a       | Mb. Hodgkin without involvement of extralymphatic organs                          | n/a         | n/a | n/a  | 0.3                     |
| H32 | Normocellular bone marrow; trilinear differentiation | 56      | f   | 12.9      | 393       | 0  | 6.3       | Mb. Hodgkin without involvement of extralymphatic organs                          | n/a         | n/a | n/a  | 0.6                     |
| H33 | Normocellular bone marrow; trilinear differentiation | n/a     | m   | n/a       | n/a       | 0  | n/a       | Mb. Hodgkin without involvement of extralymphatic organs                          | n/a         | n/a | n/a  | 2.5                     |
| M1  | PMF                                                  | 31      | f   | n/a       | n/a       | 0  | n/a       |                                                                                   | +           | n/a | -    | 6.57                    |
| M2  | PMF                                                  | 64      | m   | 11.0      | 608       | 1  | 11.6      |                                                                                   | +           | n/a | -    | 5.4                     |
| M3  | PMF                                                  | 53      | f   | n/a       | n/a       | 0  | n/a       |                                                                                   | +           | n/a | -    | 4.57                    |
| M4  | PMF                                                  | 64      | f   | 13.4      | 950       | 1  | 14.6      |                                                                                   | +           | n/a | -    | 8.97                    |
| M5  | PMF                                                  | 30      | f   | 13.6      | 647       | 2  | 16.7      |                                                                                   | -           | -   | +    | 57.8                    |
| M6  | PMF                                                  | 61      | m   | 10.9      | 199       | 3  | n/a       |                                                                                   | +           | n/a | -    | 69.43                   |



| #   | Diagnosis Pathology | Age [y] | Sex | Hb [g/dl] | Plt [g/l] | MF | WBC [g/l] | clinical background | JAK2(V617F) | MPL | CALR | GlI1 mean frequency [%] |
|-----|---------------------|---------|-----|-----------|-----------|----|-----------|---------------------|-------------|-----|------|-------------------------|
| M7  | PMF                 | 66      | f   | 7.0       | 120       | 3  | 19.6      |                     | +           | n/a | -    | 70.63                   |
| M8  | PMF                 | 49      | f   | 14.5      | 603       | 0  | 8.9       |                     | +           | n/a | -    | 4.33                    |
| M9  | PMF                 | 73      | f   | 13.4      | 1218      | 0  | 17.6      |                     | +           | n/a | -    | 6.1                     |
| M10 | PMF                 | 55      | m   | 19.6      | 846       | 0  | 6.6       |                     | -           | n/a | n/a  | 3.33                    |
| M11 | PMF                 | 76      | m   | 9.1       | 56        | 3  | 9.4       |                     | +           | n/a | -    | 76.0                    |
| M12 | PMF                 | 40      | m   | 15.3      | 1321      | 0  | 8.6       |                     | -           | -   | +    | 4.23                    |
| M13 | PMF                 | 76      | f   | 14.3      | 818       | 0  | 11.3      |                     | +           | -   | -    | 3.93                    |
| M14 | PMF                 | 57      | f   | 11.6      | 108       | 3  | 21.4      |                     | -           | -   | +    | 36.7                    |
| M15 | PMF                 | 81      | f   | 8.4       | 49        | 3  | 13.6      |                     | +           | n/a | -    | 60.43                   |
| M16 | PMF                 | 71      | m   | 9.5       | 700       | 2  | 6.5       |                     | -           | -   | -    | 47.57                   |
| M17 | PMF                 | 74      | m   | 13.3      | 692       | 0  | 11.7      |                     | -           | -   | +    | 15.67                   |
| M18 | PMF                 | 74      | m   | 7.3       | 359       | 3  | 1.53      |                     | +           | -   | -    | 68.5                    |
| M19 | PMF                 | 71      | m   | 13.6      | 992       | 0  | 10.90     |                     | +           | -   | -    | 4.03                    |
| M20 | PMF                 | 75      | f   | 13.4      | 637       | 0  | 8.90      |                     | -           | -   | -    | 2.37                    |
| M21 | PMF                 | 75      | m   | 8.7       | 338       | 2  | 7.90      |                     | +           | -   | -    | 63.0                    |
| M22 | PMF                 | 35      | f   | 11.9      | 477       | 2  | 9.50      |                     | -           | n/a | n/a  | 62.67                   |
| M23 | PMF                 | 78      | m   | 10.8      | 82        | 3  | 11.30     |                     | +           | -   | -    | 73.80                   |
| M24 | PMF                 | 87      | f   | 13.2      | 1135      | 0  | 29.80     |                     | +           | -   | -    | 6.47                    |
| M25 | PMF                 | 55      | m   | 13.0      | 530       | 2  | 17.70     |                     | -           | n/a | n/a  | 56.3                    |
| M26 | PMF                 | 33      | m   | 14.5      | 660       | 0  | 10.4      |                     | n/a         | n/a | n/a  | 5                       |
| M27 | ET                  | 84      | f   | 10.5      | 366       | 1  | 4.6       |                     | n/a         | n/a | n/a  | 13.5                    |
| M28 | ET                  | 48      | f   | 13.0      | 517       | 0  | 6.3       |                     | n/a         | n/a | n/a  | 16                      |
| M29 | ET                  | 63      | m   | 14.7      | 760       | 1  | 15.7      |                     | n/a         | n/a | n/a  | 25                      |
| M30 | ET                  | 71      | f   | 16.1      | 719       | 0  | 7.8       |                     | +           | n/a | n/a  | 4                       |
| M31 | ET                  | 69      | f   | 13.3      | 1071      | 1  | 7.20      |                     | +           | n/a | n/a  | 16.5                    |
| M32 | ET                  | 45      | f   | 13.8      | 696       | 0  | 6.7       |                     | +           | n/a | n/a  | 5                       |
| M33 | ET                  | 81      | f   | 10.1      | 43        | 1  | 39.8      |                     | n/a         | n/a | n/a  | 13.5                    |
| M34 | ET                  | 24      | m   | 16.3      | 1917      | 0  | 10.9      |                     | -           | n/a | n/a  | 5.5                     |
| M35 | ET                  | 75      | m   | 8.8       | 142       | 2  | 16.1      |                     | -           | n/a | n/a  | 22                      |
| M36 | ET                  | 67      | m   | 16.3      | 792       | 0  | 8.5       |                     | -           | n/a | n/a  | 9                       |
| M37 | ET                  | 50      | f   | 12.3      | 1036      | 0  | 8.4       |                     | -           | n/a | n/a  | 6.5                     |
| M38 | ET                  | 55      | m   | 16.8      | 1162      | 0  | 8.6       |                     | +           | n/a | n/a  | 13.5                    |
| M39 | PCV                 | 72      | m   | 11.3      | 46        | 0  | 17.9      |                     | n/a         | n/a | n/a  | 5.5                     |
| M40 | PCV                 | 64      | f   | 12.1      | 477       | 0  | 15.6      |                     | n/a         | n/a | n/a  | 13.5                    |
| M41 | PCV                 | 60      | f   | 17.6      | 192       | 1  | 11.2      |                     | n/a         | n/a | n/a  | 15.5                    |
| M42 | PCV                 | 54      | f   | 17.4      | 421       | 0  | 13        |                     | +           | n/a | n/a  | 5                       |
| M43 | PCV                 | 80      | m   | 10.1      | 938       | 1  | 29        |                     | n/a         | n/a | n/a  | 19.5                    |
| M44 | PCV                 | 56      | m   | 16.2      | 326       | 0  | 16.8      |                     | +           | n/a | n/a  | 10                      |
| M45 | PCV                 | 47      | m   | 19.6      | 353       | 1  | 8.6       |                     | +           | n/a | n/a  | 19.5                    |
| M46 | PCV                 | 67      | f   | 16.9      | 336       | 0  | 8.8       |                     | +           | n/a | n/a  | 6.5                     |
| M47 | PCV                 | 70      | m   | 15.2      | 814       | 0  | 22        |                     | +           | n/a | n/a  | 9.5                     |
| M48 | PCV                 | 59      | f   | 14.6      | 488       | 1  | 19.1      |                     | +           | n/a | n/a  | 17.5                    |
| M49 | PCV                 | 74      | m   | 14.0      | 1491      | 0  | 26.3      |                     | +           | n/a | n/a  | 10                      |

| #   | Diagnosis Pathology | Age [y] | Sex | Hb [g/dl] | Plt [g/l] | MF | WBC [g/l] | clinical background | JAK2(V617F) | MPL | CALR | Gli1 mean frequency [%] |
|-----|---------------------|---------|-----|-----------|-----------|----|-----------|---------------------|-------------|-----|------|-------------------------|
| M50 | PMF                 | 69      | f   | 7.1       | 208       | 4  | 38.9      |                     | n/a         | n/a | n/a  | 64                      |
| M51 | PMF                 | 62      | m   | 8.9       | 766       | 3  | 6.3       |                     | n/a         | n/a | n/a  | 37.5                    |
| M52 | PMF                 | 35      | m   | 14.2      | 414       | 2  | 11.4      |                     | +           | n/a | n/a  | 28.5                    |
| M53 | PMF                 | 68      | f   | 15.7      | 314       | 2  | 22.3      |                     | +           | n/a | n/a  | 60                      |
| M54 | PMF                 | 58      | f   | 8.5       | 903       | 2  | 18.1      |                     | n/a         | n/a | n/a  | 17.5                    |
| M55 | PMF                 | 83      | m   | 9.6       | 890       | 2  | 5.7       |                     | n/a         | n/a | n/a  | 54                      |
| M56 | PMF                 | 67      | f   | 13.0      | 952       | 1  | 18.3      |                     | +           | n/a | n/a  | 16                      |
| M57 | PMF                 | 69      | m   | 10.7      | 164       | 3  | 13.3      |                     | +           | n/a | n/a  | 70                      |
| M58 | PMF                 | 48      | m   | 13.9      | 606       | 2  | 10.8      |                     | +           | n/a | n/a  | 37                      |
| M59 | PMF                 | 70      | f   | 8.1       | 421       | 1  | 15.4      |                     | +           | n/a | n/a  | 26.5                    |
| M60 | PMF                 | 65      | f   | 8.7       | 217       | 3  | 24.4      |                     | 0           | n/a | n/a  | 45                      |

#H1-H33, control bone marrow punch biopsies; #M1-M60, MPN bone marrow punch biopsies; PMF, primary myelofibrosis; ET, essential thrombocythemia; PCV, polycythemia vera; Hb, hemoglobin; Plt, platelets; MF, myelofibrosis grade (reticulin grade); WBC, white blood cells; CALR, calreticulin.

**Table S2 Patient characteristics human mesenchymal stem cell isolation** (related to STAR Methods)

---

| <b>Age</b> | <b>Gender</b> | <b>Diagnosis</b>                              |
|------------|---------------|-----------------------------------------------|
| 66         | M             | hip replacement, no known hematologic disease |
| 73         | M             | hip replacement, no known hematologic disease |
| 50         | F             | hip replacement, no known hematologic disease |
| 58         | F             | hip replacement, no known hematologic disease |
| 55         | M             | essential thrombocythemia (ET)                |
| 42         | M             | essential thrombocythemia (ET)                |
| 43         | F             | polycythaemia vera (PV)                       |
| 64         | F             | primary myelofibrosis (PMF)                   |

---



**Table S3 Primer pairs used for mouse PCR** (related to STAR Methods)

| Gene          | Sequence                                                             |
|---------------|----------------------------------------------------------------------|
| GAPDH         | Fw 5'-AGGTCGGTGTGAACGGATTTG -3'<br>Rv 5'-TGTAGACCATGTAGTTGAGGTCA -3' |
| iDTR (HB-EGF) | Fw 5'-GGAGCACGGGAAAAGAAAG-3'<br>Rv5'-GAGCCCGGAGCTCCTTCACA-3          |
| Col3α1        | Fw5'- TGGAGGATGGTTGCACGAAA-3'<br>Rv5'- ACAGCCTTGCGTGTTGATA-3'        |
| fibronectin   | Fw5'-ATCTGGACCCCTCTGATAGT -3'<br>Rv5'-GCCCAGTGATTTCAAGAAAGG-3'       |
| α-SMA         | Fw5'-CTGACAGAGGCACCACTGAA -3'<br>Rv5'- CATCTCCAGAGTCCAGCACA-3'       |
| Gli1          | Fw5'- ATCACCTGTTGGGGATGCTGGAT-3'<br>Rv5'- CGTGAATAGGACTTCCGACAG-3'   |
| PI3K          | Fw5'-CTCTCCTGTGCTGGCTACTGT-3'<br>Rv5'-GCTCTCGGTTGATTCCAAACT-3'       |
| Akt           | Fw5'-TAGGCCAGTCGCCCG-3'<br>Rv5'-GGGTAACCCAGGGATGATGC-3'              |
| Cxcl4         | Fw5'-CAGTGGCACCCCTCTT-3'<br>Rv5'-ATCGCTTTCTTCGGG-3'                  |
| Endothelin 1  | Fw5'-CGTCGTACCGTATGGACTGG-3'<br>Rv5'-GCCTGGTCTGTGGCCTTATT-3'         |
| MMP9          | Fw5'-AAAGGCAGCGTTAGCCAGAA-3'<br>Rv5'-GGTCTTTGGGAAGACCACA-3'          |
| ALOX12        | Fw5'-CAACCTAGTGCCTTTGTGGC-3'<br>Rv5'-TCGGGAACGTCGAAGTCAA-3'          |
| PPARγ         | Fw5'-CAGGTCAGAGTCGCCCG-3'<br>Rv5'-GCGACCCAATACCCAGC-3'               |
| Bcl2          | Fw5'-GCGTCAACAGGGAGATGTCA-3'<br>Rv5'-GCATGCTGGGGCCATATAGT-3'         |
| P21           | Fw5'-TCAAGTGTGACCCGG-3'<br>Rv5'-CCTTGGGGTCGACGT-3'                   |

**Table S4 Primer pairs used for human PCR** (related to STAR Methods)

| Gene            | Sequence                                                           |
|-----------------|--------------------------------------------------------------------|
| GAPDH           | Fw 5'- GACAGTCAGCCGCATCTTCT-3'<br>Rv 5'- GCGCCCAATACGACCAAATC-3'   |
| Gli1            | Fw5'- GAGCCAGAAGTTGGGACCTC-3'<br>Rv5'- CCTCGCTCCATAAGGCTCAG -3'    |
| Col1 $\alpha$ 1 | Fw5'- CCCAGCCACAAAGAGTCTACA-3'<br>Rv5'- ATTGGTGGGATGTCTTCGTCT -3'  |
| Col3 $\alpha$ 1 | Fw5'-AAGGCTGCAAGATGGATGCT -3'<br>Rv5'-GTGCTTACGTGGGACAGTCA -3'     |
| fibronectin     | Fw5'-AACAAACACTAATGTTAATTGCCCA-3'<br>Rv5'-TCGGGAATCTTCTCTGTCAGC-3' |
| $\alpha$ -SMA   | Fw5'- ACTGCCTTGGTGTGTGACAA-3'<br>Rv5'- CACCATCACCCCCTGATGTC-3'     |
